# Supplementary material for: Dual-factor loaded functional silk fibroin scaffolds for peripheral nerve regeneration with the aid of neovascularization
Source: Royal Society of Chemistry journal article supplement (doi:10.1039/c5ra22054h), 2016-01-01
Supplement: c5ra22054h1.pdf [file c5ra22054h1.pdf]

Electronic Supplementary Information

## Dual-factor loaded functional silk fibroin scaffolds for peripheral nerve regeneration with the aid of neovascularization

Qiangqiang Liu <sup>a</sup>(Co-first author), Jianwen Huang <sup>b</sup>(Co-first author), Huili Shao <sup>a</sup>, Lujie Song <sup>b,\*</sup>,  
Yaopeng Zhang <sup>a,\*</sup>

<sup>a</sup> State Key Laboratory for Modification of Chemical Fibers and Polymer Materials,  
College of Materials Science and Engineering, Donghua University, Shanghai 201620, P. R.  
China. zyp@dhu.edu.cn; Fax: +86-21-67792955; Tel: +86-21-67792954

<sup>b</sup> Department of Urology, Shanghai Jiao Tong University Affiliated Sixth People's  
Hospital, Shanghai 200233, P. R. China. E-mail: ljsong@sjtu.edu.cn; Fax: +86-21-64701361; Tel:  
+86-21-64369181

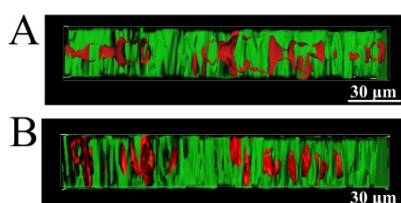

Figure S1 The cross sectional images of 3D cytoskeletal of SCs on (A) bare RSF scaffolds and (B) RSF scaffolds loaded with BDNF and VEGF. The images are the combined images of bright field channel and fluorescent channel of LSCM. The 3D data of bright field images as well as the fluorescent 3D data of rhodamine phalloidin were recorded simultaneously. The cross sectional morphology was obtained by rebuilding the fluorescent cell and silk scaffolds in bright fields from Imaris 6.2 software. Green represents silk fibers while red represents cells.
